# Supplementary material for: Contrast agents possessing high temperature sensitivity
Source: Royal Society of Chemistry journal article supplement (doi:10.1039/c1cc13073k), 2011-01-01
Supplement: c1cc13073k.pdf [file c1cc13073k.pdf]

**Supplemental Information**  
**for**  
**Contrast agents possessing high temperature sensitivity**

**Mark Milne and Robert H.E. Hudson\***

**Table of Contents**

|                                                                                                                                                          |   |
|----------------------------------------------------------------------------------------------------------------------------------------------------------|---|
| <b>S1.</b> Synthesis of Tetrapropargyl DOTAM ( <b>1</b> ) .....                                                                                          | 1 |
| <b>S2.</b> Metalation of <b>Ln(1)</b> .....                                                                                                              | 1 |
| <b>S3.</b> Temperature vs. $\delta$ (ppm) <b>Dy(1)</b> H <sub>4</sub> .....                                                                              | 1 |
| <b>S4.</b> Temperature vs. $\delta$ (ppm) <b>Tb(1)</b> H <sub>4</sub> .....                                                                              | 2 |
| <b>S5.</b> Temperature vs. $\delta$ (ppm) <b>Tm(1)</b> H <sub>4</sub> .....                                                                              | 2 |
| <b>S6.</b> Temperature vs. $\delta$ (ppm) <b>Tm(1)</b> H <sub>5</sub> .....                                                                              | 3 |
| <b>S7.</b> Temperature vs. $\delta$ (ppm) for <b>Tm(1)</b> H <sub>4</sub> , H <sub>5</sub> and 5% BSA <b>Tm(1)</b> H <sub>4</sub> , H <sub>5</sub> ..... | 3 |
| <b>S8.</b> Table S1. $\delta$ (ppm) vs. pH of <b>Tm(1)</b> H <sub>5</sub>                                                                                |   |
| <b>S9.</b> Chemical shift versus temperature for <b>Dy(1)</b> H <sub>4</sub> in the presence of 1 mM Ca <sup>2+</sup> .....                              |   |
| <b>S10.</b> Chemical shift versus temperature for <b>Tb(1)</b> H <sub>4</sub> in the presence of 1 mM Ca <sup>2+</sup> .....                             |   |
| <b>S11.</b> Chemical shift versus temperature for <b>Tm(1)</b> H <sub>4</sub> in the presence of 1 mM Ca <sup>2+</sup> .....                             |   |
| <b>S12.</b> Chemical shift versus temperature for <b>Tm(1)</b> H <sub>5</sub> in the presence of 1 mM Ca <sup>2+</sup> .....                             |   |
| <b>S13.</b> Table S2. Temperature coefficients measured at 1 mM Ca <sup>2+</sup> with 10 mM Ln <sup>3+</sup> ( <b>1</b> ) in D <sub>2</sub> O. ...       |   |
| <b>S14.</b> NMR Parameters .....                                                                                                                         | 4 |

### S1. Tetrapropargyl DOTAM (**1**)

To a stirred solution of cyclen (38 mg, 0.22 mmol) and DIPEA (154  $\mu$ L, 4 mmol) in 5 mL acetonitrile, *N*-(propargyl) chloroacetamide (**6**) (131 mg, 1 mmol) was added in one portion and then refluxed overnight. The product was precipitated with 5 mL H<sub>2</sub>O and filtered as a white solid (66 mg, 0.11 mmol), yield 54%. <sup>1</sup>H NMR (400 MHz, DMSO-d<sub>6</sub>):  $\delta$  7.57 (4H, m); 3.05 (8H, m); 2.22 (10H, m); 1.79 (14H, s); 1.67 (4H, s.). HRMS (ESI-TOF) *m/z* calc C<sub>28</sub>H<sub>40</sub>N<sub>8</sub>O<sub>4</sub> (M+H)<sup>+</sup>, 553.3251, found 553.2574.

### S2. Metallated Tetrapropargyl DOTAM (Ln(**1**))

Tetrapropargyl DOTAM (**1**) (55 mg, 0.1 mmol) was added to a stirred solution of dioxane:H<sub>2</sub>O (4 mL) containing one of the following lanthanides at 1.1 eq: TbCl<sub>3</sub>, DyCl<sub>3</sub>, TmCl<sub>3</sub>. The progress of the metallation of **1** was monitored by UPLC/MS and upon completion the solvent was removed under reduced pressure. The solid was then taken in 1 mL H<sub>2</sub>O and passed through a column of size exclusion gel. The fractions collected were tested against xylenol orange for the presence of free metals. Fractions identified as containing the metallated ligand were found not to contain free metal ions. HRMS (ESI-TOF) *m/z*: C<sub>28</sub>H<sub>40</sub>N<sub>8</sub>O<sub>4</sub>Tb (M+COOH)<sup>+</sup>, calc 757.2481, found 757.3318; C<sub>28</sub>H<sub>40</sub>N<sub>8</sub>O<sub>4</sub>Dy (M+COOH)<sup>+</sup>, calc 756.2627, found 756.3125; C<sub>28</sub>H<sub>40</sub>N<sub>8</sub>O<sub>4</sub>Tm (M+COOH)<sup>+</sup>, calc 767.2570, found 767.3286.

### S3. Temperature vs. $\delta$ (ppm) Dy(**1**) H<sub>4</sub>

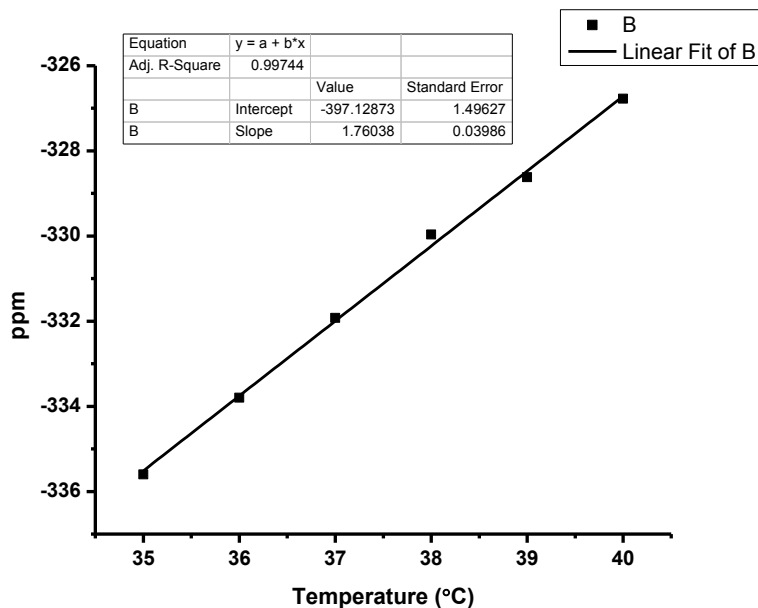

**S4. Temperature vs.  $\delta$  (ppm) **Tb(1)** H<sub>4</sub>**

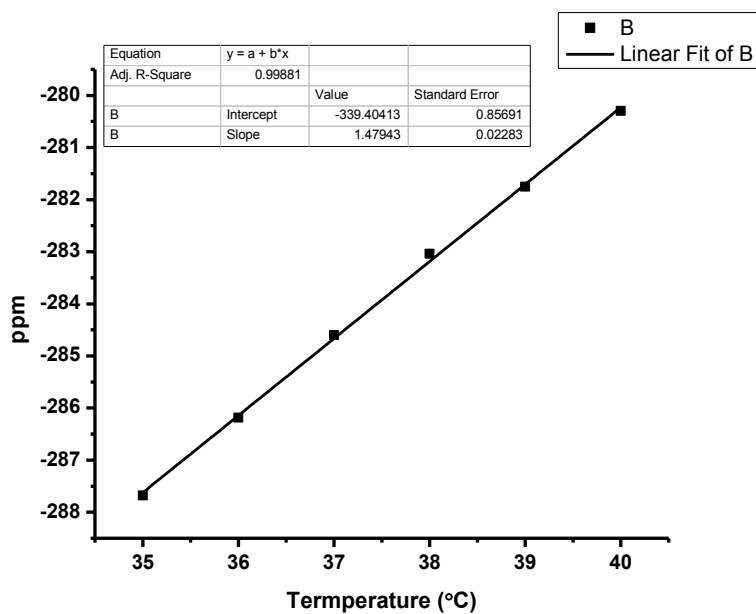

**S5. Temperature vs.  $\delta$  (ppm) **Tm(1)** H<sub>4</sub>**

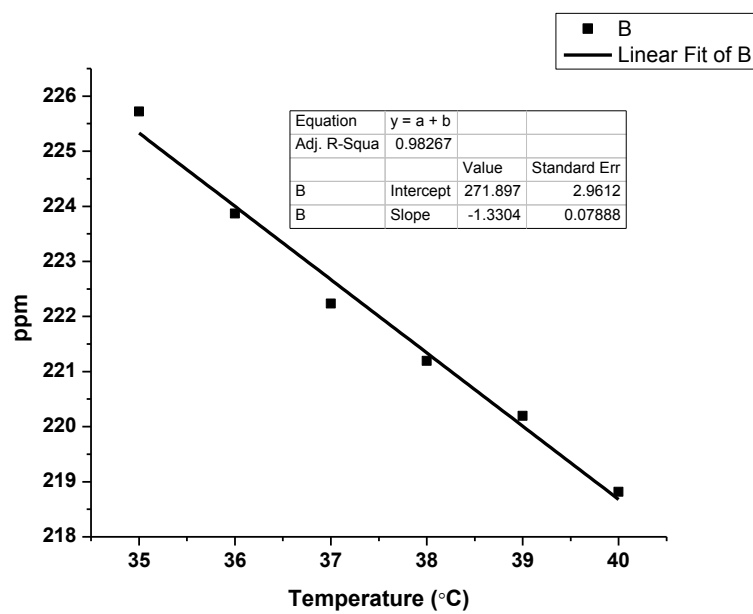

**S6. Temperature vs.  $\delta$  (ppm) **Tm(1)** H<sub>5</sub>**

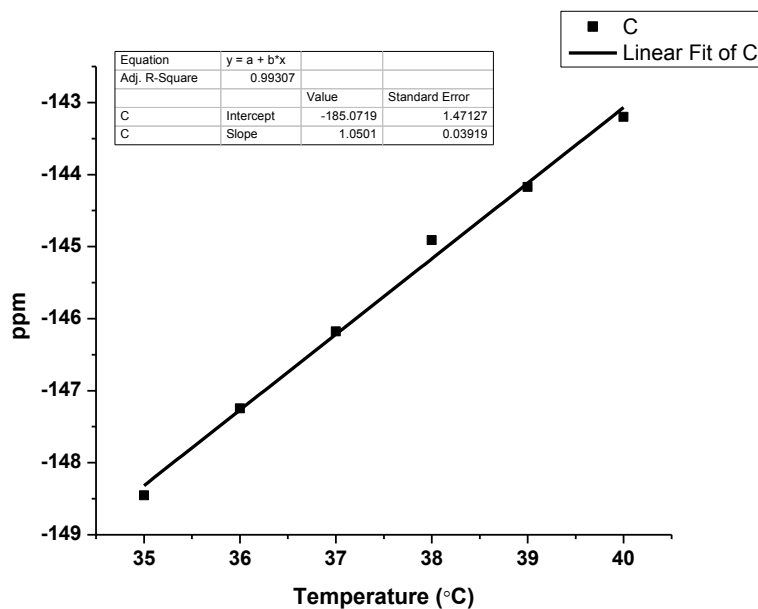

**S7. Temperature vs.  $\delta$  (ppm) **Tm(1)** H<sub>4</sub>, H<sub>5</sub> in 5% BSA**

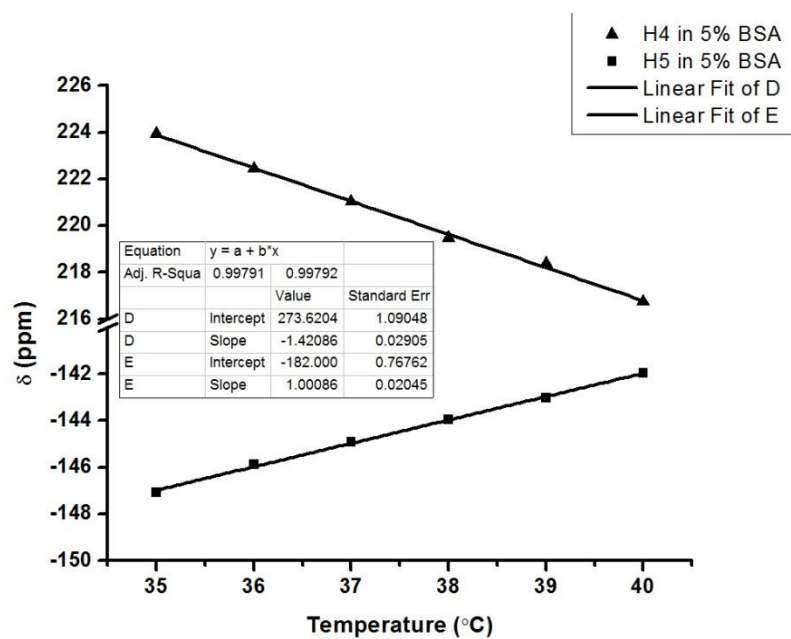

**S8.**

Table S1.  $\delta$  (ppm) vs. pH of Tm(**1**) H<sub>5</sub>

| pH   | ppm     |
|------|---------|
| 6.00 | -144.99 |
| 6.98 | -144.94 |
| 8.22 | -144.92 |
| 9.22 | -145.10 |

**S9.** Chemical shift versus temperature for Dy(**1**) H<sub>4</sub> in the presence of 1 mM Ca<sup>2+</sup>

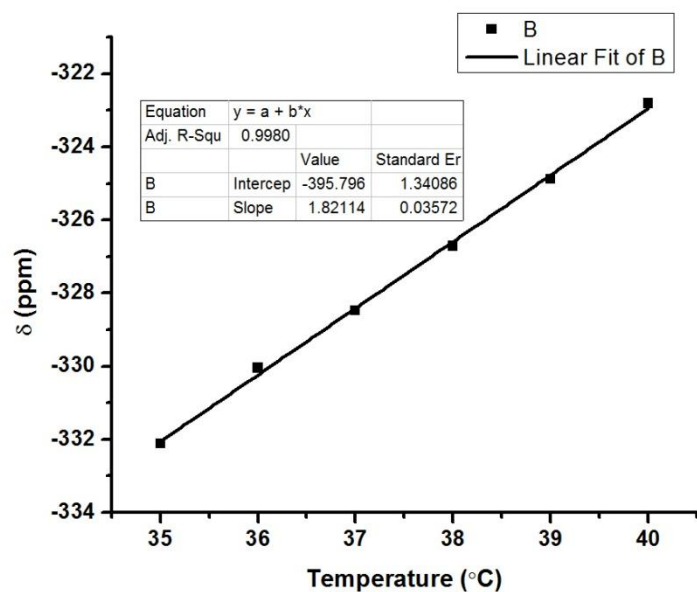

**S10.** Chemical shift versus temperature for Tb(1) H<sub>4</sub> in the presence of 1 mM Ca<sup>2+</sup>

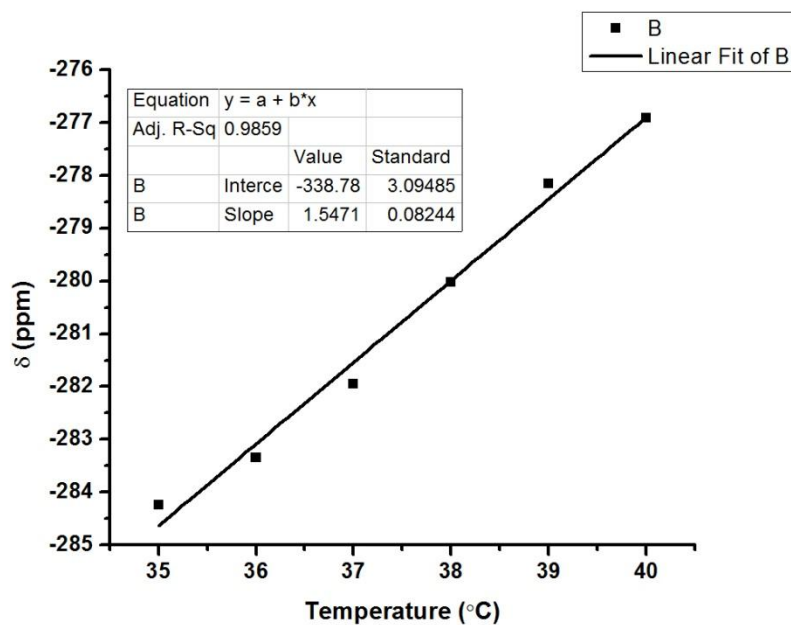

**S11.** Chemical shift versus temperature for Tm(1) H<sub>4</sub> in the presence of 1 mM Ca<sup>2+</sup>

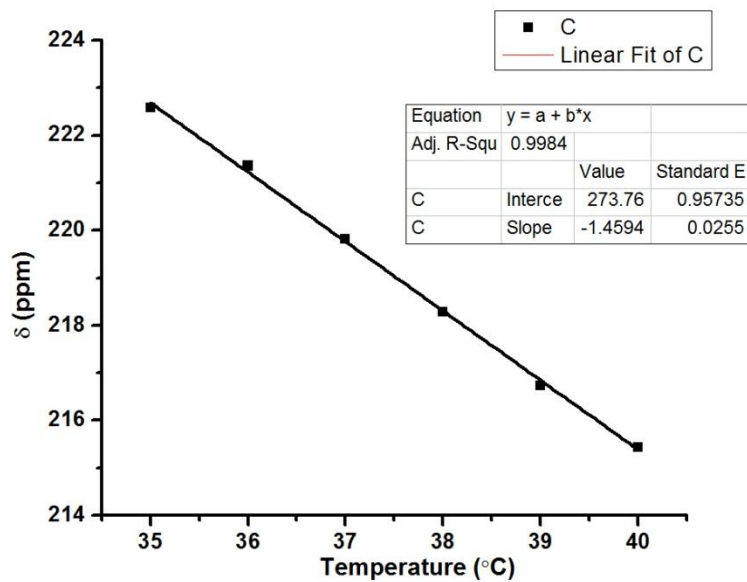

**S12.** Chemical shift versus temperature for Tm(**1**) H<sub>5</sub> in the presence of 1 mM Ca<sup>2+</sup>

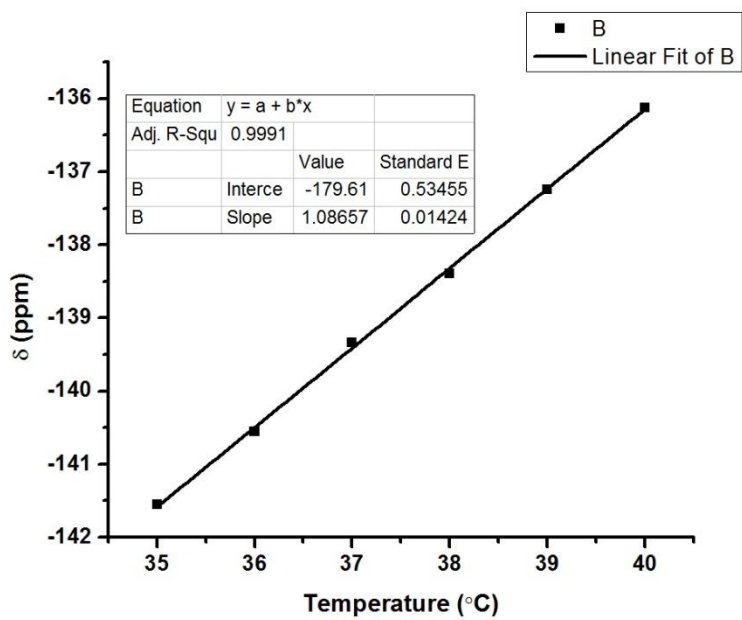

**S13.**

Table S2. Temperature coefficients measured at 1 mM Ca<sup>2+</sup> with 10 mM Ln<sup>3+</sup> (**1**) in D<sub>2</sub>O.

|                         | Tb <sup>3+</sup> H <sub>4</sub> | Tm <sup>3+</sup> H <sub>4</sub> | Tm <sup>3+</sup> H <sub>5</sub> | Dy <sup>3+</sup> H <sub>4</sub> |
|-------------------------|---------------------------------|---------------------------------|---------------------------------|---------------------------------|
| C <sub>T</sub> (ppm/°C) | 1.55                            | 1.46                            | 1.09                            | 1.82                            |

**S14.** The NMR experiments were performed on a 600 MHz Varian vertical bore magnet.  $^1\text{H}$  experiments of  $\text{Ln}^{3+}$  complexes were done in deuterated water. Temperature dependence studies were done in distilled water using the variable temperature (VT) control supplied, which was first calibrated using glycol. Temperature calibration experiments of Ln complexes were done at 20 mM in a range of 35°C – 40°C in triplicate and averaged. Parameters used, 100 scans, Tm: relaxation delay = 0.8 sec, observed pulse = 20°, sweep width = -170 to 250 ppm, acquisition time = 1.0 sec, overall time = 3:05. Tb: relaxation delay = 0.8 sec, observed pulse = 20°, sweep width = -325 to 250 ppm, acquisition time = 0.76 sec, overall time = 2:41. Dy: relaxation delay = 0.8 sec, observed pulse = 20°, sweep width = -250 to 150 ppm, acquisition time = 0.9 sec, overall time = 2:55.

Parameters used in 5% BSA study, 16 scans, Tm: relaxation delay = 0.8 sec, observed pulse = 20°, sweep width = -170 to 250 ppm, acquisition time = 1.0 sec, overall time = 34 s. FIDs were then line broadened 30 Hz, phased corrected and baseline subtracted.

$T_1$  measurements were obtained using an inversion recovery method using sixteen delay values at 35 °C.
